# Supplementary material for: Characterizing Intercity Mobility Patterns for the Greater Bay Area in China
Source: MDPI journal article supplement (doi:10.3390/ijgi12010005), 2022-12-26
Supplement: s1 [file s1]

Archive with 1 entries (1 files):
- ijgi-2021339-supplementary.pdf
